# Supplementary material for: Transparent TiO2 nanotubes supporting silver sulfide for photoelectrochemical water splitting
Source: Royal Society of Chemistry journal article supplement (doi:10.1039/d4nr01440e), 2024-01-01
Supplement: d4nr01440e1.pdf [file d4nr01440e1.pdf]

## Transparent TiO<sub>2</sub> nanotubes supporting silver sulfide for photoelectrochemical water splitting

Wiktoria Lipińska<sup>1</sup>, Stefania Wolff<sup>1,2</sup>, Katharina E. Dehm<sup>3</sup>, Simon P. Hager<sup>3</sup>,  
Justyna Gumieniak<sup>4</sup>, Agnieszka Kramek<sup>4</sup>, Ryan W. Crisp<sup>3</sup>, Emerson Coy<sup>5</sup>, Katarzyna  
Grochowska<sup>1</sup>, Katarzyna Siuzdak<sup>1</sup>

<sup>1</sup>Centre for Plasma and Laser Engineering, Institute of Fluid-Flow Machinery, Polish Academy of Sciences, Fiszerza 14 Street, 80-231 Gdańsk, Poland

<sup>2</sup>Faculty of Applied Physics and Mathematics, Institute of Nanotechnology and Materials Engineering, Gdansk University of Technology, Narutowicza 11/12 Street, 80-233 Gdańsk, Poland

<sup>3</sup>Chemistry of Thin Film Materials, Department of Chemistry and Pharmacy, Friedrich-Alexander-Universität Erlangen-Nürnberg, Cauerstrasse 3, 91058 Erlangen, Germany

<sup>4</sup>The Faculty of Mechanics and Technology, Rzeszów University of Technology, Kwiatkowskiego 4 Street, 37-450 Stalowa Wola, Poland

<sup>5</sup>NanoBioMedical Centre, Adam Mickiewicz University, Wszechnicy Piastowskiej 3 St., 61-614 Poznań, Poland

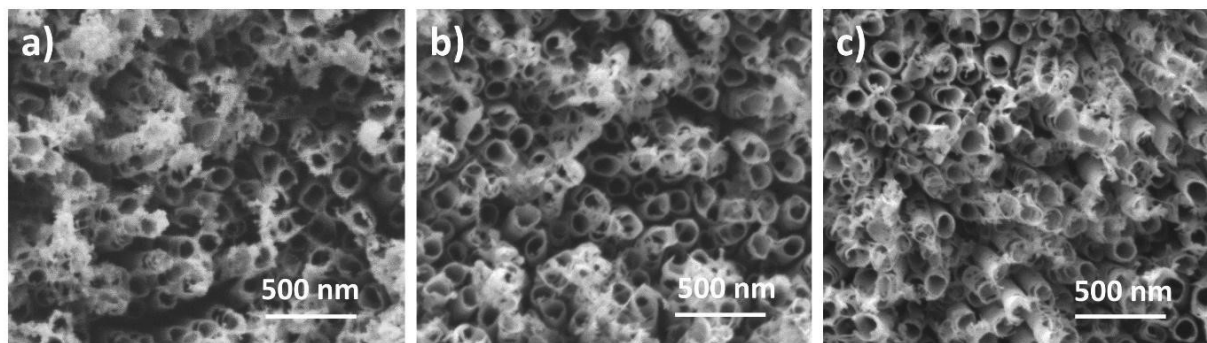

**Figure S1** SEM images of a) 5-Ag<sub>2</sub>S/fTiNT, b) 25-Ag<sub>2</sub>S/fTiNT, c) 45-Ag<sub>2</sub>S/fTiNT.

**Table S1** The calculated values for electric equivalent circuit elements for nanotubes formed on the foil (fTiNT) and glass substrate (gTiNT).

| parameter | unit                                  | fTiNT                | gTiNT                |
|-----------|---------------------------------------|----------------------|----------------------|
| Re        | $\Omega \text{ cm}^2$                 | 1.2                  | 214                  |
| R1        | $\Omega \text{ cm}^2$                 | 3143                 | 41                   |
| Q1        | $\text{F cm}^{-2}$                    | $3 \times 10^{-5}$   | $1 \times 10^{-4}$   |
| n1        |                                       | 0.86                 | 0.54                 |
| R2        | $\Omega \text{ cm}^2$                 | 7.1                  | 15074                |
| Q2        | $\Omega \text{ cm}^2$                 | $3 \times 10^{-5}$   | $8 \times 10^{-5}$   |
| n2        | $\text{F cm}^{-2}$                    | 0.62                 | 0.66                 |
| Wor1      | -                                     | $7 \times 10^{-3}$   | $4 \times 10^{-6}$   |
| Woc1      | $\Omega \text{ cm}^2 \text{s}^{-1/2}$ | $4.3 \times 10^{-8}$ | $3.9 \times 10^{-9}$ |

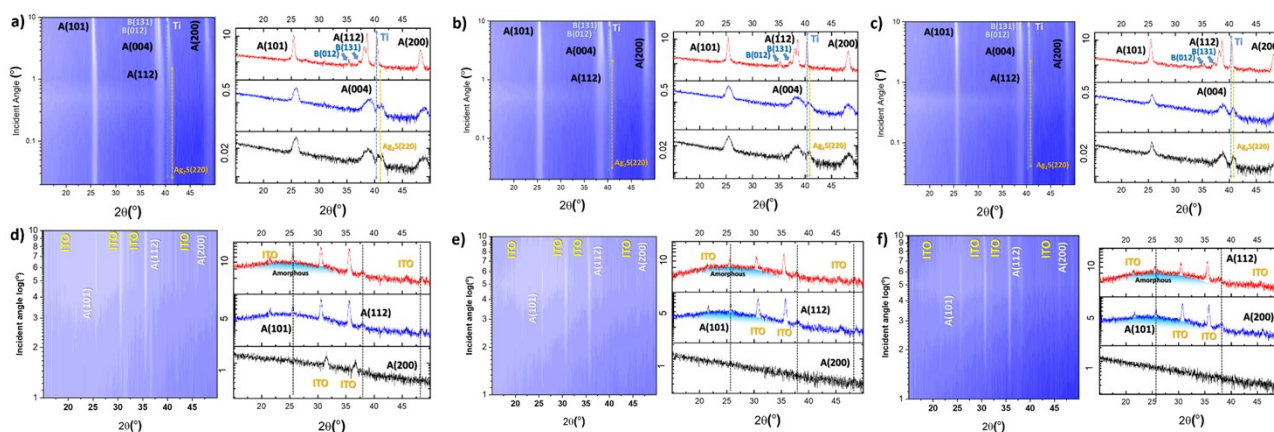

**Figure S2.** a) 5-Ag<sub>2</sub>S/fTiNT, b) 25-Ag<sub>2</sub>S/fTiNT, c) 45-Ag<sub>2</sub>S/fTiNT, d) 5-Ag<sub>2</sub>S/gTiNT, e) 25-Ag<sub>2</sub>S/gTiNT, f) 45-Ag<sub>2</sub>S/gTiNT.

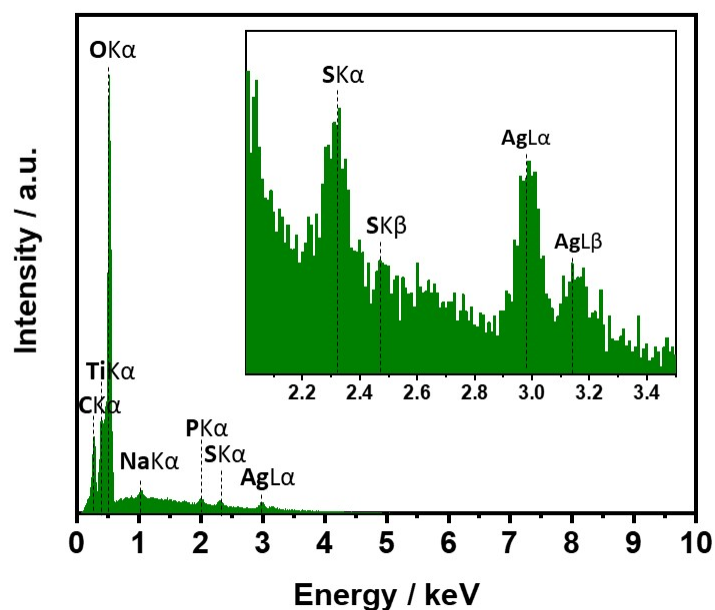

**Figure S3** EDX spectrum of sample 45-Ag<sub>2</sub>S/gTiNT taken at an acceleration voltage of 5 kV showing the expected elements are present.

**Table S2** Tabulated values of the atomic percentages from the EDX spectrum of sample 45-Ag<sub>2</sub>S/gTiNT with a ratio of Ag to S of 2.25.

| Element   | Line     | Atom %           |
|-----------|----------|------------------|
| C         | K        | 6.36±0.06        |
| O         | K        | 57.06±0.32       |
| Na        | K        | 0.49±0.04        |
| P         | K        | 0.79±0.06        |
| <b>S</b>  | <b>K</b> | <b>1.26±0.07</b> |
| Ti        | L        | 31.20±0.32       |
| <b>Ag</b> | <b>L</b> | <b>2.84±0.12</b> |
| Total     |          | 100.00           |

**Table S3** Percentage contribution (in at.%) and binding energy of core levels (in eV) of gTiNT, fTiNT, 25-Ag<sub>2</sub>S/gTiNT, 25-Ag<sub>2</sub>S/fTiNT and 45-Ag<sub>2</sub>S/gTiNT used for XPS analysis.

| Sample       | Peak                 | Component        | BE eV  | Atomic % | Sample       | Peak                 | Component        | BE eV  | Atomic % |
|--------------|----------------------|------------------|--------|----------|--------------|----------------------|------------------|--------|----------|
| <b>gTiNT</b> |                      |                  |        |          | <b>fTiNT</b> |                      |                  |        |          |
|              | Ti 2p <sub>3/2</sub> | TiO <sub>2</sub> | 458.77 | 20.70    |              | Ti 2p <sub>3/2</sub> | TiO <sub>2</sub> | 458.52 | 22.70    |
|              | O 1s                 | TiO <sub>2</sub> | 529.97 | 38.91    |              | O 1s                 | TiO <sub>2</sub> | 529.76 | 45.65    |
|              | O 1s                 | OH <sup>-</sup>  | 531.18 | 16.78    |              | O 1s                 | OH <sup>-</sup>  | 531.17 | 6.29     |

|                                 |                      |                   |        |       |                                 |                      |                   |        |       |
|---------------------------------|----------------------|-------------------|--------|-------|---------------------------------|----------------------|-------------------|--------|-------|
|                                 | O 1s                 | O-C=O             | 532.59 | 3.42  |                                 | O 1s                 | O-C=O             | 532.28 | 2.06  |
|                                 | C 1s                 | C-C               | 284.54 | 14.10 |                                 | C 1s                 | C-C               | 284.61 | 18.08 |
|                                 | C 1s                 | C-O-C             | 286.08 | 2.82  |                                 | C 1s                 | C-O-C             | 286.21 | 2.26  |
|                                 | C 1s                 | O-C=O             | 288.36 | 3.27  |                                 | C 1s                 | O-C=O             | 288.61 | 2.96  |
| <b>25-Ag<sub>2</sub>S/gTiNT</b> |                      |                   |        |       | <b>25-Ag<sub>2</sub>S/fTiNT</b> |                      |                   |        |       |
|                                 | Ti 2p <sub>3/2</sub> | TiO <sub>2</sub>  | 458.51 | 16.80 |                                 | Ti 2p <sub>3/2</sub> | TiO <sub>2</sub>  | 458.51 | 16.80 |
|                                 | O 1s                 | TiO <sub>2</sub>  | 529.75 | 44.64 |                                 | O 1s                 | TiO <sub>2</sub>  | 529.79 | 26.28 |
|                                 | O 1s                 | OH <sup>-</sup>   | 531.15 | 7.21  |                                 | O 1s                 | OH <sup>-</sup>   | 530.98 | 27.56 |
|                                 | O 1s                 | O-C=O             | 532.28 | 2.07  |                                 | O 1s                 | O-C=O             | 532.28 | 1.50  |
|                                 | C 1s                 | C-C               | 284.65 | 16.58 |                                 | C 1s                 | C-C               | 284.57 | 18.81 |
|                                 | C 1s                 | C-O-C             | 286.1  | 2.29  |                                 | C 1s                 | C-O-C             | 286.2  | 1.74  |
|                                 | C 1s                 | O-C=O             | 288.36 | 2.06  |                                 | C 1s                 | O-C=O             | 288.37 | 1.72  |
|                                 | Ag 3d <sub>5/2</sub> | Ag <sub>2</sub> S | 367.46 | 1.54  |                                 | Ag 3d <sub>5/2</sub> | Ag <sub>2</sub> S | 367.36 | 3.07  |
|                                 | S 2p <sub>3/2</sub>  | Ag <sub>2</sub> S | 160.56 | 0.84  |                                 | S 2p <sub>3/2</sub>  | Ag <sub>2</sub> S | 160.34 | 1.23  |
| <b>45-Ag<sub>2</sub>S/gTiNT</b> |                      |                   |        |       |                                 |                      |                   |        |       |
|                                 | Ti 2p <sub>3/2</sub> | TiO <sub>2</sub>  | 458.51 | 19.48 |                                 |                      |                   |        |       |
|                                 | O 1s                 | TiO <sub>2</sub>  | 529.76 | 35.31 |                                 |                      |                   |        |       |
|                                 | O 1s                 | OH <sup>-</sup>   | 530.98 | 16.22 |                                 |                      |                   |        |       |
|                                 | O 1s                 | O-C=O             | 532.38 | 1.98  |                                 |                      |                   |        |       |
|                                 | C 1s                 | C-C               | 284.57 | 18.44 |                                 |                      |                   |        |       |
|                                 | C 1s                 | C-O-C             | 286.05 | 2.08  |                                 |                      |                   |        |       |
|                                 | C 1s                 | O-C=O             | 288.42 | 1.82  |                                 |                      |                   |        |       |
|                                 | Ag 3d <sub>5/2</sub> | Ag <sub>2</sub> S | 367.37 | 2.07  |                                 |                      |                   |        |       |
|                                 | S 2p <sub>3/2</sub>  | Ag <sub>2</sub> S | 160.38 | 1.75  |                                 |                      |                   |        |       |

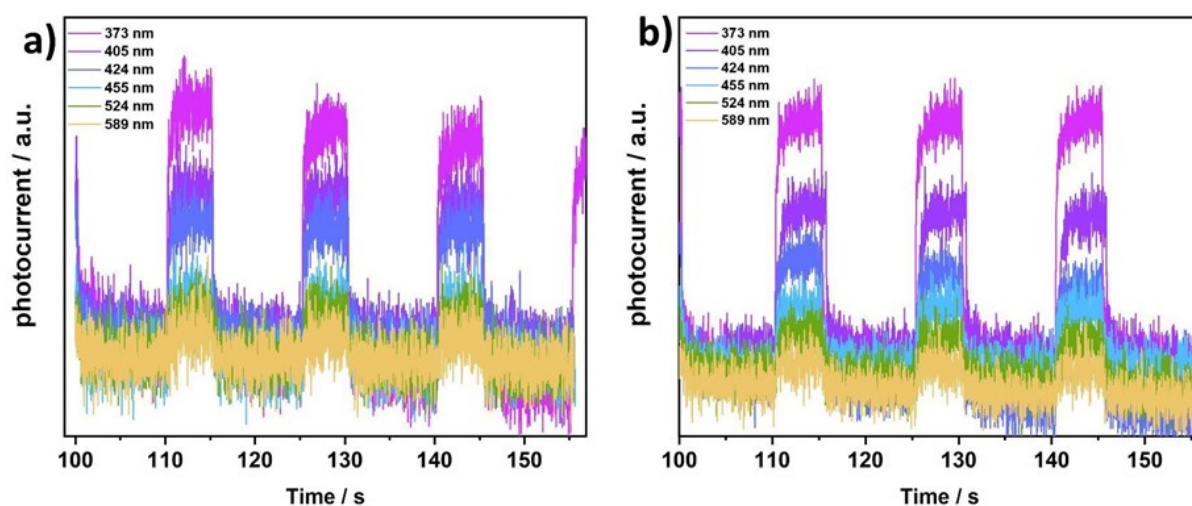

**Figure S4** Photocurrent vs. time for different wavelength 25Ag<sub>2</sub>S/gTiNT recorded at a) +0.5 V and b) +1 V vs. Ag/AgCl/0.1 M KCl in 0.5 M Na<sub>2</sub>SO<sub>4</sub>.

**Table S4** Location of Raman bands for the 25- and 45-Ag<sub>2</sub>S/gTiNT electrode Y stands for yes indicating presence of particular signal on the Raman spectrum.

| Wavenumber / cm <sup>-1</sup>   | 145                             | 225           | 240-290 |     | 295-360 |     | 790    | 970 |  |
|---------------------------------|---------------------------------|---------------|---------|-----|---------|-----|--------|-----|--|
|                                 |                                 |               | 250     | 276 | 310     | 340 |        |     |  |
| <b>25-Ag<sub>2</sub>S/gTiNT</b> |                                 |               |         |     |         |     |        |     |  |
| before                          | -                               | Y             | Y       | Y   | -       | Y   | -      | -   |  |
| after 3 cycles                  | -                               | Y             | Y       | Y   | Y       | Y   | Y      | -   |  |
| after 10 cycles                 | Y                               | Y             | Y       | Y   | Y       | Y   | Y      | Y   |  |
| <b>45-Ag<sub>2</sub>S/gTiNT</b> |                                 |               |         |     |         |     |        |     |  |
| before                          | -                               | Y             | Y       | -   | -       | -   | -      | -   |  |
| after 3 cycles                  | Y                               | Y             | Y       | -   | -       | Y   | -      | Y   |  |
| after 10 cycles                 | Y                               | -             | -       | Y   | Y       | Y   | Y      | -   |  |
|                                 | Ag <sub>2</sub> SO <sub>3</sub> | Ag-S/<br>Ag-O | Ag-S    |     | Ag-O    |     | O-Ag-O | S-O |  |

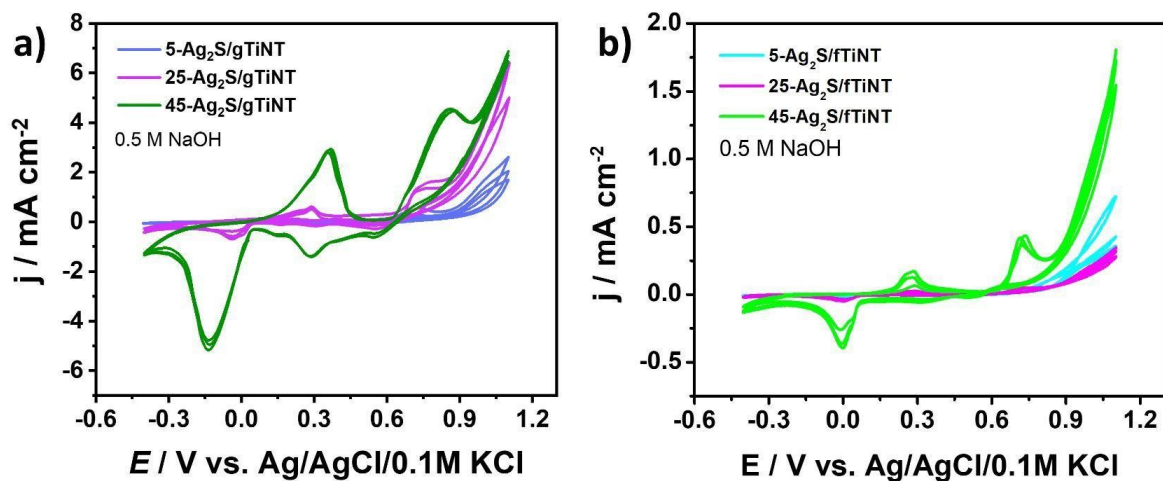

**Figure S5** Repeatability test for a)  $\text{Ag}_2\text{S}$  coated gTiNT and b)  $\text{Ag}_2\text{S}$  coated fTiNT (3 cycles, scan rate  $50 \text{ mV/s}$ ).

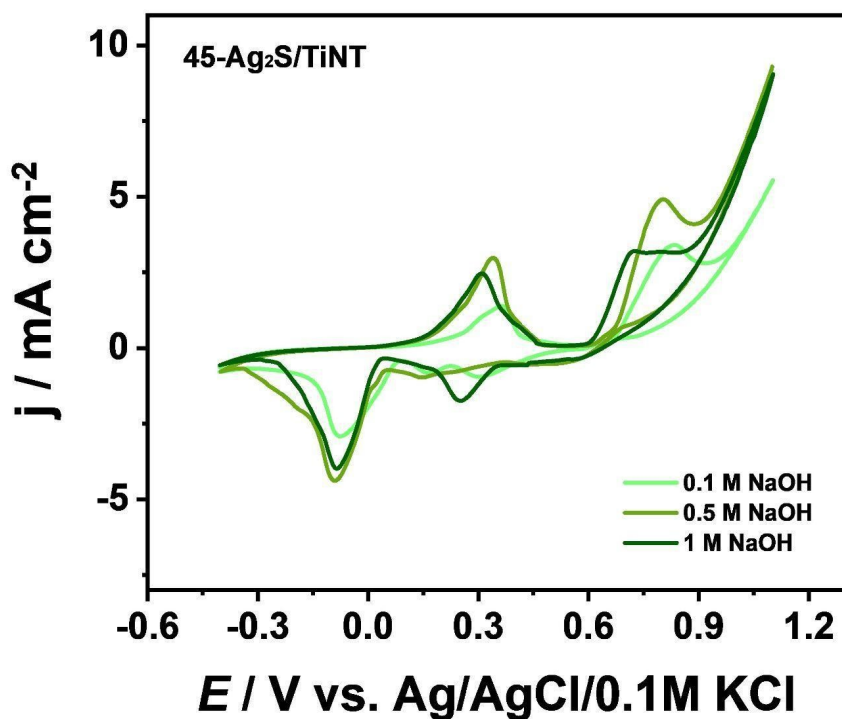

**Figure S6** Cyclic voltammetry curves for  $45\text{-Ag}_2\text{S/TiNT}$  in  $0.1 \text{ M}$ ,  $0.5 \text{ M}$  and  $1 \text{ M NaOH}$  electrolyte (scan rate  $50 \text{ mV/s}$ ).

**Table S5** Location of Raman bands for the 25- and 45- $\text{Ag}_2\text{S/gTiNT}$  electrode  
 Y stands for yes indicating presence of particular signal on the Raman spectrum.

| Wavenumber / $\text{cm}^{-1}$                    | 145    | 225           | 240-290 |     |     | 295-360 |     | 790    | 980 | 1077 |
|--------------------------------------------------|--------|---------------|---------|-----|-----|---------|-----|--------|-----|------|
|                                                  |        |               | 255     | 270 | 280 | 300     | 330 |        |     |      |
| <b>25-<math>\text{Ag}_2\text{S/gTiNT}</math></b> |        |               |         |     |     |         |     |        |     |      |
| before                                           | -      | Y             | Y       | -   | Y   | -       | Y   | -      | -   | -    |
| after 3 cycles                                   | -      | Y             | Y       | -   | Y   | -       | Y   | -      | -   | -    |
| after 10 cycles                                  | Y      | -             | -       | Y   | -   | Y       | Y   | Y      | -   | Y    |
| <b>45-<math>\text{Ag}_2\text{S/gTiNT}</math></b> |        |               |         |     |     |         |     |        |     |      |
| before                                           | -      | Y             | Y       |     |     | -       | -   | -      | -   | -    |
| after 3 cycles                                   | Y      | Y             | Y       |     |     | -       | -   | -      | -   | -    |
| after 10 cycles                                  | Y      | -             | -       |     |     | Y       | Y   | Y      | Y   | Y    |
|                                                  | T Ag-S | Ag-S/<br>Ag-O | Ag-S    |     |     | Ag-O    |     | O-Ag-O | S-O | Ag-O |

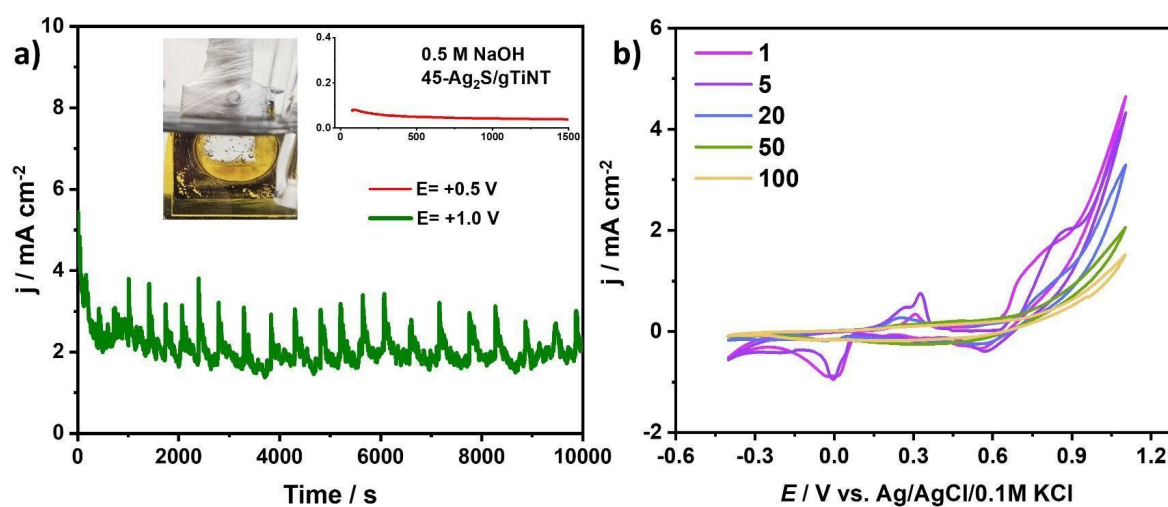

**Figure S7** a) Chronoamperometry curves for the 45- $\text{Ag}_2\text{S/gTiNT}$  registered at +1.0 V in 0.5 M NaOH. The inset shows a reference measurement registered at +0.5 V, b) Cyclic voltamperometry curves for the 45- $\text{Ag}_2\text{S/gTiNT}$  in 0.5 M NaOH recorded at 50 mV/s.
